# Supplementary material for: High affinity targeting of CD23 inhibits IgE synthesis in human B cells
Source: PubMed Central journal article supplement (PMC4693728; doi:10.1002/iid3.72), 2015-07-14

Figure S1

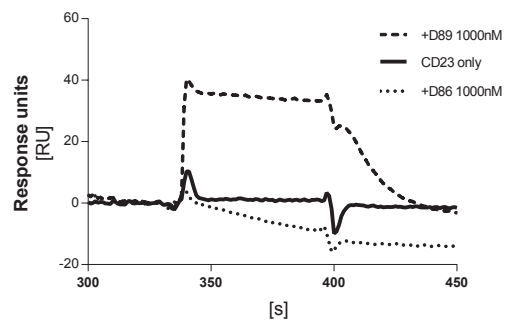

Figure S2

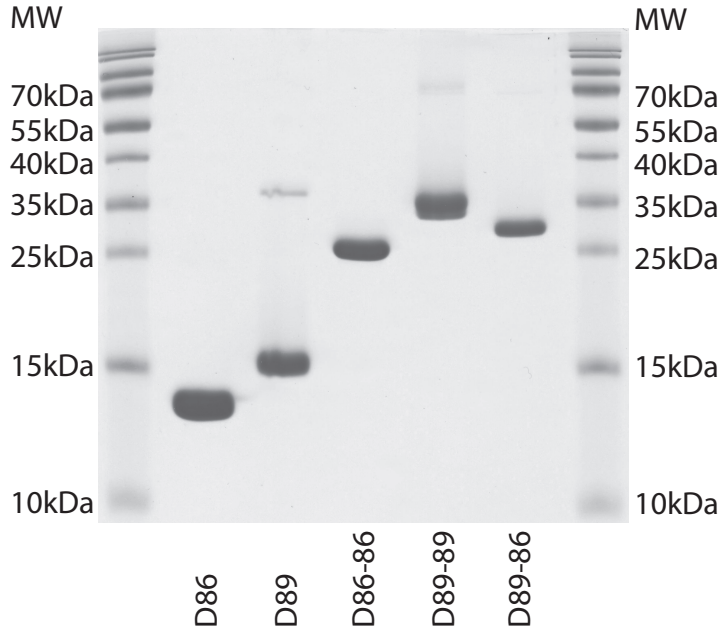

Figure S3

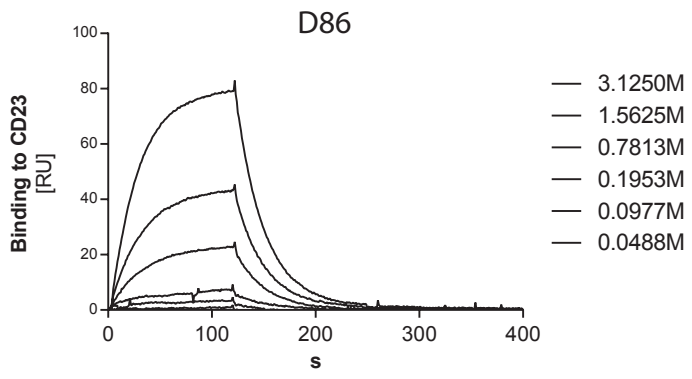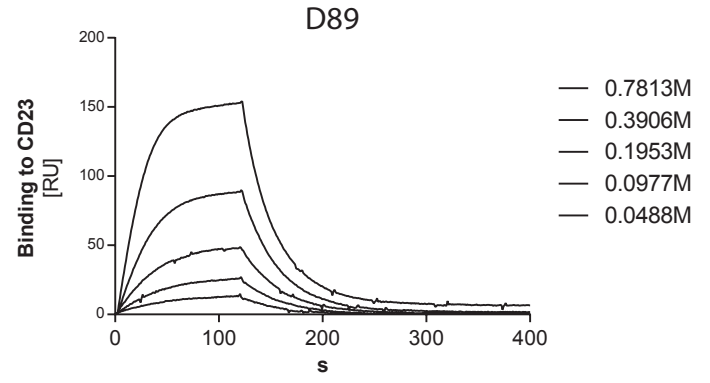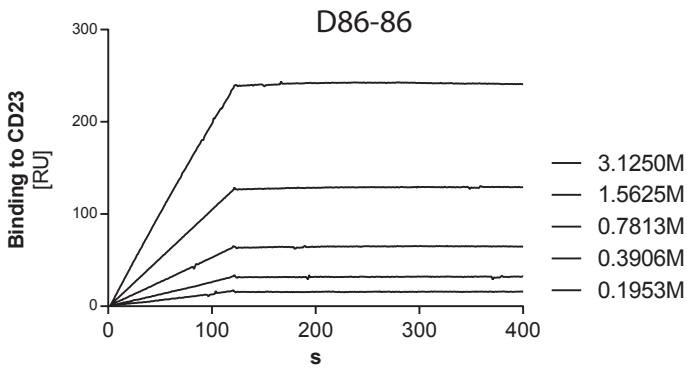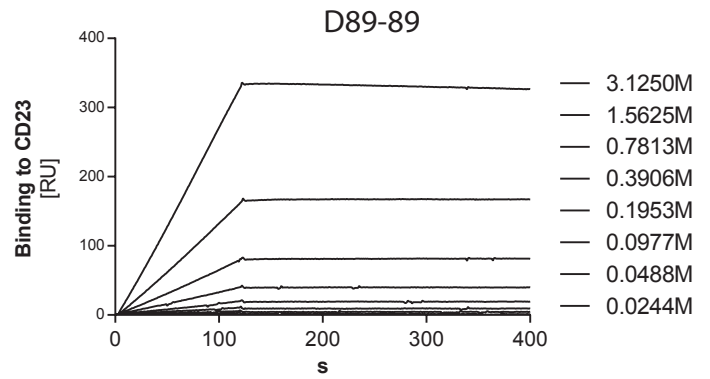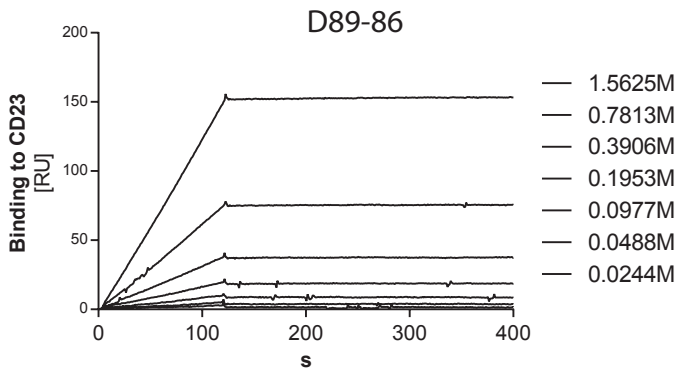

Figure S4

A

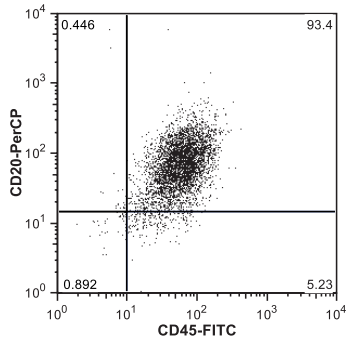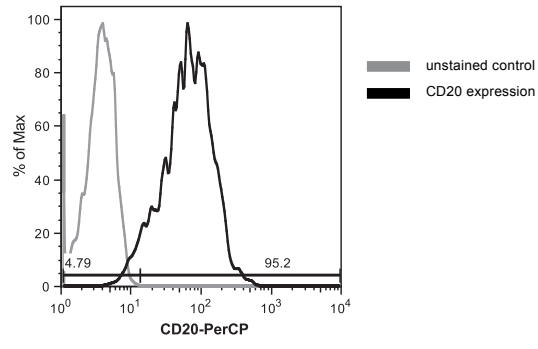

B

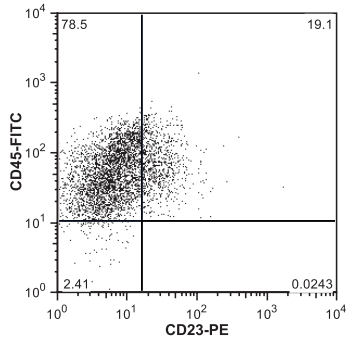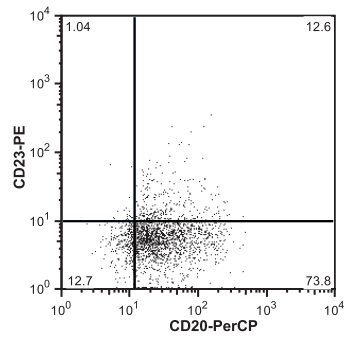

Figure S5

**A**

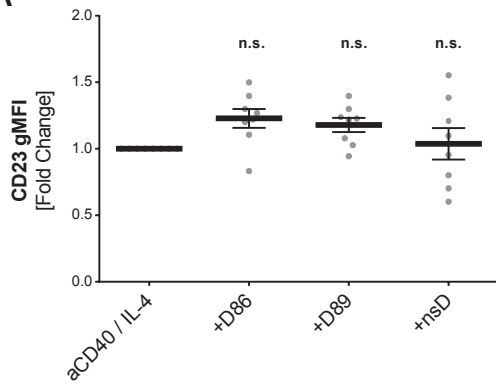

**B**

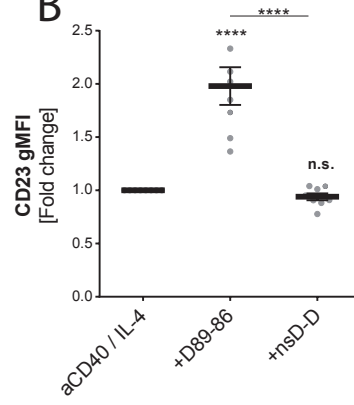

**C**

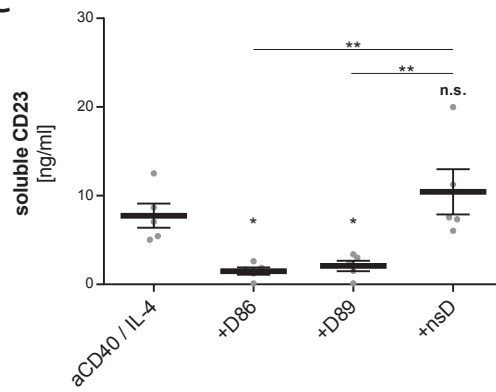

**D**

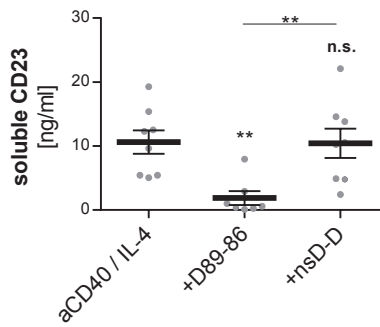

**E**

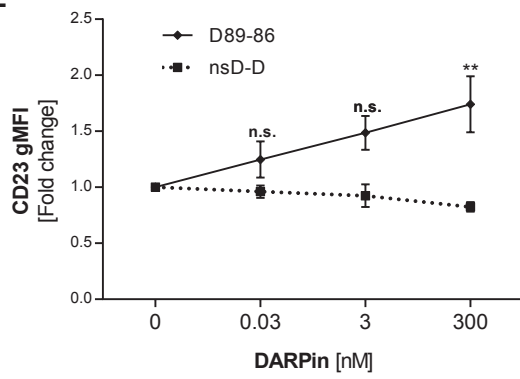

Figure S6

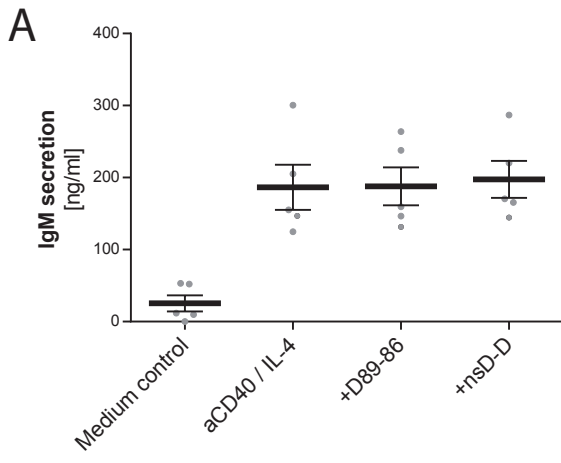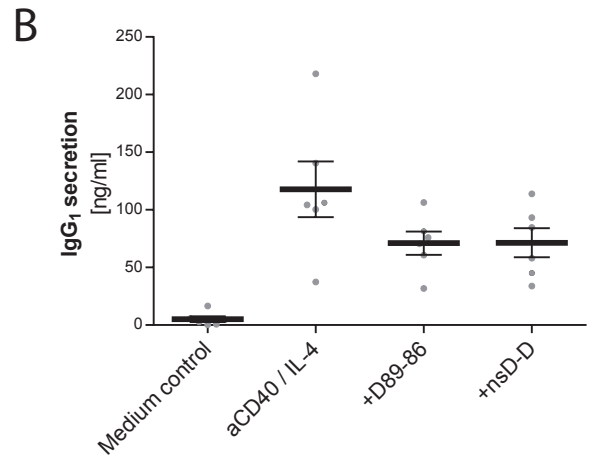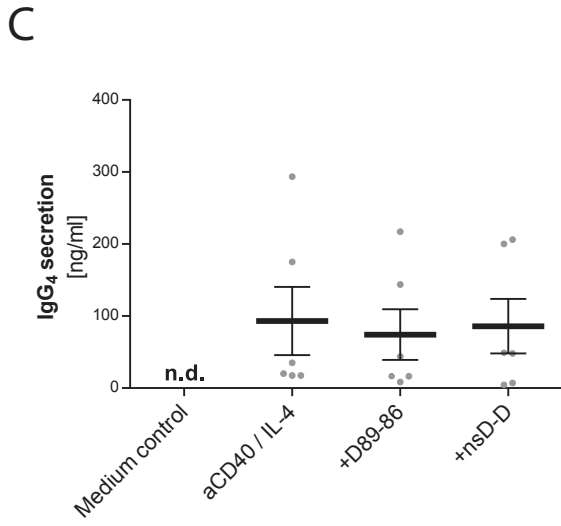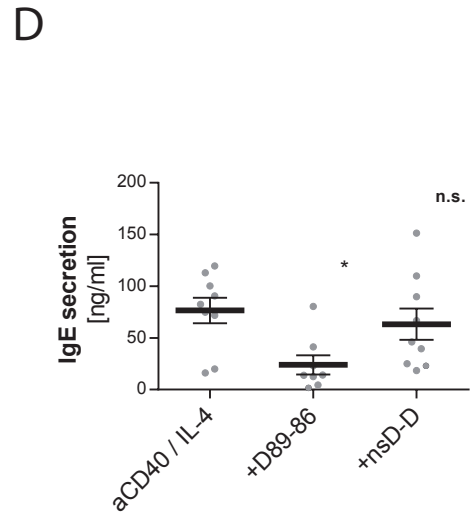

Supplement: IID3-3-339-s002.pdf [file IID3-3-339-s002.pdf]
